# Supplementary material for: Corneal endothelium features in Fuchs’ Endothelial Corneal Dystrophy: A preliminary 3D anterior segment optical coherence tomography study
Source: PLoS One. 2018 Nov 29;13(11):e0207891. doi: 10.1371/journal.pone.0207891 (PMC6264151; doi:10.1371/journal.pone.0207891)
Supplement: S1 Table — (XLSX) [file pone.0207891.s001.xlsx]

## Sheet: Sheet1
Sex	Age	Visus_logMAR	Biomicroscopy	OCT Pattern	ST_mean_reflectivity	SN_mean_reflectivity	IT_mean_reflectivity	IN_mean_reflectivity	Endothelial_CC	ECD	CV	HEX	CCT		ST_Pattern (0/1)	SN_Pattern (0/1)	IT_Pattern (0/1)	IN_Pattern (0/1)
M	52	0.2	2	1	108	106	110	110	33	1222	16	70	552		1	1	1	1
M	52	0.3	2	1	107	110	106	110	46	1841	29	59	556		1	1	1	1
M	63	1.3	6	2	109	107	110	109	0	0	0	0	696		1	1	1	1
M	63	0.3	5	1	110	109	110	110	0	0	0	0	640		1	1	1	1
F	62	0.7	5	2	106	109	103	107	11	787	30	55	610		1	1	1	1
F	62	0.7	4	1	110	111	110	111	0	0	0	0	670		1	1	1	1
F	42	0	2	1	110	110	109	110	43	1258	40	37	465		1	1	1	1
F	42	0	2	1	108	110	111	110	59	1583	46	42	463		1	1	1	1
F	55	0	3	2	108	107	109	109	0	0	0	0	530		1	1	1	1
F	55	0	4	1	110	108	110	107	0	0	0	0	550		1	1	1	1
F	50	0	3	1	108	107	109	107	0	0	0	0	572		1	1	1	1
F	50	0.1	4	1	107	105	109	106	0	0	0	0	580		1	1	1	1
F	55	0.1	3	1	110	111	110	112	0	1166	17	64	559		1	1	1	1
F	55	0.1	4	1	110	110	111	111	0	0	0	0	565		1	1	1	1
F	63	0	3	1	111	111	111	111	0	924	32	46	541		1	1	1	1
F	63	0	3	1	112	110	110	107	0	996	32	33	570		1	1	1	1
F	60	0	3	1	111	111	111	112	30	1246	37	47	488		1	1	1	1
F	60	0.1	3	1	111	110	111	111	41	1565	37	49	478		1	1	1	1
F	74	0.1	4	1	110	109	110	112	0	0	0	0	505		1	1	1	1
F	74	1	6	2	109	110	111	107	0	0	0	0	699		1	1	1	1
VA: visual acuity; FECD: Fuchs’ endothelial corneal dystrophy; SD: standard deviation; ST: supero-temporal; SN: supero-nasal; IT: infero-temporal; IN: infero-nasal; CC: cells count; ECD: endothelial cell density; CV: Coefficient of Variation; Hex: Percentage of Hexagonal cell; CCT: central corneal thickness.
OCT Pattern: 1 = ‘homogeneous’, 2 = “dotty”, 3 = “marmoreal”
Sub-Analysis of OCT pattern in each quadrant: 0 = Homogeneous; 1 = Dotty / Marmoreal

## Sheet: Sheet2
				OCT Pattern											ST_Pattern (0/1)	SN_Pattern (0/1)	IT_Pattern (0/1)	IN_Pattern (0/1)
		0.2													1	1	1	1
		0.3													1	1	1	1
		1.3													1	1	1	1
		0.3													1	1	1	1
		0.7													1	1	1	1
		0.7													1	1	1	1
		0													1	1	1	1
		0													1	1	1	1
		0													1	1	1	1
		0													1	1	1	1
		0													1	1	1	1
		0.1													1	1	1	1
		0.1													1	1	1	1
		0.1													1	1	1	1
		0													1	1	1	1
		0													1	1	1	1
		0													1	1	1	1
		0.1													1	1	1	1
		0.1													1	1	1	1
		1													1	1	1	1
VA: visual acuity; FECD: Fuchs’ endothelial corneal dystrophy; SD: standard deviation; ST: supero-temporal; SN: supero-nasal; IT: infero-temporal; IN: infero-nasal; CC: cells count; ECD: endothelial cell density; CV: Coefficient of Variation; Hex: Percentage of Hexagonal cell; CCT: central corneal thickness.
OCT Pattern: 1 = ‘homogeneous’, 2 = “dotty”, 3 = “marmoreal”
Sub-Analysis of OCT pattern in each quadrant: 0 = Homogeneous; 1 = Dotty / Marmoreal

## Sheet: Sheet3
				OCT Pattern											ST_Pattern (0/1)	SN_Pattern (0/1)	IT_Pattern (0/1)	IN_Pattern (0/1)
		0.2													1	1	1	1
		0.3													1	1	1	1
		1.3													1	1	1	1
		0.3													1	1	1	1
		0.7													1	1	1	1
		0.7													1	1	1	1
		0													1	1	1	1
		0													1	1	1	1
		0													1	1	1	1
		0													1	1	1	1
		0													1	1	1	1
		0.1													1	1	1	1
		0.1													1	1	1	1
		0.1													1	1	1	1
		0													1	1	1	1
		0													1	1	1	1
		0													1	1	1	1
		0.1													1	1	1	1
		0.1													1	1	1	1
		1													1	1	1	1
VA: visual acuity; FECD: Fuchs’ endothelial corneal dystrophy; SD: standard deviation; ST: supero-temporal; SN: supero-nasal; IT: infero-temporal; IN: infero-nasal; CC: cells count; ECD: endothelial cell density; CV: Coefficient of Variation; Hex: Percentage of Hexagonal cell; CCT: central corneal thickness.
OCT Pattern: 1 = ‘homogeneous’, 2 = “dotty”, 3 = “marmoreal”
Sub-Analysis of OCT pattern in each quadrant: 0 = Homogeneous; 1 = Dotty / Marmoreal
