# Supplementary material for: Corneal endothelium features in Fuchs’ Endothelial Corneal Dystrophy: A preliminary 3D anterior segment optical coherence tomography study
Source: PLoS One. 2018 Nov 29;13(11):e0207891. doi: 10.1371/journal.pone.0207891 (PMC6264151; doi:10.1371/journal.pone.0207891)
Supplement: S2 Table — (XLSX) [file pone.0207891.s002.xlsx]

## Sheet: Sheet1
Sex	Age	Visus_logMAR	Biomicroscopy	OCT Pattern	ST_mean_reflectivity	SN_mean_reflectivity	IT_mean_reflectivity	IN_mean_reflectivity	Endothelial_CC	ECD	CV	HEX	CCT		ST_Pattern (0/1)	SN_Pattern (0/1)	IT_Pattern (0/1)	IN_Pattern (0/1)
M	52	0	0	0	104	106	102	104	127	2726	34	65	585		0	0	0	0
M	48	0	0	0	105	105	103	104	115	2835	27	63	570		0	0	0	0
M	63	0.2	0	1	105	106	107	102	136	2483	20	68	526		0	1	1	0
M	64	0	0	0	108	106	102	103	135	2511	26	66	523		0	0	0	0
F	62	0	0	0	102	106	102	103	140	2400	30	65	526		0	0	0	0
F	60	0	0	1	104	108	111	110	135	2703	31	64	533		1	0	1	0
F	44	0	0	0	102	105	106	104	129	2867	27	69	500		0	0	0	0
F	41	0	0	0	104	105	105	104	130	2507	29	66	496		0	0	0	0
F	55	0.1	0	0	108	106	110	103	148	2661	29	67	533		1	0	0	0
F	53	0	0	0	106	104	104	104	124	2679	26	63	545		0	0	0	0
F	50	0	0	0	103	102	102	102	124	2726	37	67	585		0	0	0	0
F	56	0	0	0	102	103	102	103	118	2850	27	63	578		0	0	0	0
F	55	0	0	0	104	102	104	107	136	2483	20	68	540		0	0	0	0
F	49	0	0	0	105	110	108	103	135	2500	30	65	550		0	0	0	0
F	64	0	0	1	108	105	111	108	105	2207	23	70	548		1	0	1	1
F	60	0	0	1	105	107	107	107	109	2444	29	64	559		0	1	1	1
F	62	0	0	0	105	106	105	104	182	2625	31	69	546		0	0	0	0
F	58	0	0	0	103	107	103	106	158	2719	33	62	555		0	0	0	0
F	72	0	0	0	105	106	105	104	182	2625	31	69	546		0	0	0	0
F	74	0	0	0	103	107	103	106	158	2719	33	62	555		0	0	0	0
VA: visual acuity; FECD: Fuchs’ endothelial corneal dystrophy; SD: standard deviation; ST: supero-temporal; SN: supero-nasal; IT: infero-temporal; IN: infero-nasal; CC: cells count; ECD: endothelial cell density; CV: Coefficient of Variation; Hex: Percentage of Hexagonal cell; CCT: central corneal thickness.
OCT Pattern: 1 = ‘homogeneous’, 2 = “dotty”, 3 = “marmoreal”
Sub-Analysis of OCT pattern in each quadrant: 0 = Homogeneous; 1 = Dotty / Marmoreal

## Sheet: Sheet2
				OCT Pattern											ST_Pattern (0/1)	SN_Pattern (0/1)	IT_Pattern (0/1)	IN_Pattern (0/1)
		0													0	0	0	0
		0													0	0	0	0
		0.2													0	1	1	0
		0													0	0	0	0
		0													0	0	0	0
		0													1	0	1	0
		0													0	0	0	0
		0													0	0	0	0
		0.1													1	0	0	0
		0													0	0	0	0
		0													0	0	0	0
		0													0	0	0	0
		0													0	0	0	0
		0													0	0	0	0
		0													1	0	1	1
		0													0	1	1	1
		0													0	0	0	0
		0													0	0	0	0
		0													0	0	0	0
		0													0	0	0	0
VA: visual acuity; FECD: Fuchs’ endothelial corneal dystrophy; SD: standard deviation; ST: supero-temporal; SN: supero-nasal; IT: infero-temporal; IN: infero-nasal; CC: cells count; ECD: endothelial cell density; CV: Coefficient of Variation; Hex: Percentage of Hexagonal cell; CCT: central corneal thickness.
OCT Pattern: 1 = ‘homogeneous’, 2 = “dotty”, 3 = “marmoreal”
Sub-Analysis of OCT pattern in each quadrant: 0 = Homogeneous; 1 = Dotty / Marmoreal

## Sheet: Sheet3
				OCT Pattern											ST_Pattern (0/1)	SN_Pattern (0/1)	IT_Pattern (0/1)	IN_Pattern (0/1)
		0													0	0	0	0
		0													0	0	0	0
		0.2													0	1	1	0
		0													0	0	0	0
		0													0	0	0	0
		0													1	0	1	0
		0													0	0	0	0
		0													0	0	0	0
		0.1													1	0	0	0
		0													0	0	0	0
		0													0	0	0	0
		0													0	0	0	0
		0													0	0	0	0
		0													0	0	0	0
		0													1	0	1	1
		0													0	1	1	1
		0													0	0	0	0
		0													0	0	0	0
		0													0	0	0	0
		0													0	0	0	0
VA: visual acuity; FECD: Fuchs’ endothelial corneal dystrophy; SD: standard deviation; ST: supero-temporal; SN: supero-nasal; IT: infero-temporal; IN: infero-nasal; CC: cells count; ECD: endothelial cell density; CV: Coefficient of Variation; Hex: Percentage of Hexagonal cell; CCT: central corneal thickness.
OCT Pattern: 1 = ‘homogeneous’, 2 = “dotty”, 3 = “marmoreal”
Sub-Analysis of OCT pattern in each quadrant: 0 = Homogeneous; 1 = Dotty / Marmoreal
